# Supplementary material for: Acceptability of a COVID-19 Vaccine among the Saudi Population
Source: MDPI journal article supplement (doi:10.3390/vaccines9030226), 2021-03-05
Supplement: s1 [file s1]

Acceptability of a COVID-19 Vaccine among the Saudi Population.

**Section 1: Sociodemographic characteristics of respondents and general information**

- 1.1       **What is your age group?**  
18 - 29  
30 - 39  
40 - 49  
50 - 59  
≥ 60
- 1.2    **What is your gender?**  
Male  
Female
- 1.3      **What is your marital status?**  
Single  
Married  
Widowed  
Divorced
- 1.4          **What is the highest level of education you have completed?**  
Primary school  
Intermediate school  
High school  
Diploma before university  
Bachelor's degree  
Diploma post-university (postgraduate diploma)  
Postgraduate degree
- 1.5                **Please indicate the region you currently reside in:**  
Riyadh Region  
Makkah Region  
Madinah Region  
Qassim Region  
Eastern Region  
Aseer Region  
Tabuk Region  
Hail Region  
Northern Borders Region  
Jazan Region  
Najran Region  
Al Baha Region  
Al Jowf Region
- 1.6      **What is your current occupation?**  
Government employee  
Non-government employee  
Self-employed  
Student

---

---

---

---

---

---

---

---

---

---

---

---

---

---

---

---

---

---

---

---

---

---

---

---

---

---

---

---

---

---

---

---

---

---

---

---

---

---

3.1 Scientists around the world are currently working on a vaccine that could prevent people from getting infected with COVID-19. It is hoped that the vaccine will become available in a few months. In the case that a COVID-19 vaccine becomes available in the next few months, with an effective rate between 90-94.5%. Would you be willing to get the COVID-19 vaccine if it was provided free by the government?

\_\_\_\_\_ Yes

\_\_\_\_\_ No

3.2 Do you support that the COVID-19 vaccine should be compulsory for all citizens and residents in Saudi Arabia?

\_\_\_\_\_ Yes

\_\_\_\_\_ No

**Thank you for your time in participating in this study**

---
